# Supplementary material for: Effects of argon on the analytical properties of a microwave-sustained, inductively coupled, atmospheric-pressure plasma
Source: Royal Society of Chemistry journal article supplement (doi:10.1039/d2ja00036a), 2022-01-01
Supplement: d2ja00036a3.pdf [file d2ja00036a3.pdf]

# **Effects of argon on the analytical properties of a microwave-sustained, inductively coupled, atmospheric-pressure plasma**

## **- Electronic supplementary information -**

Helmar Wiltsche <sup>a\*</sup>, Matthias Wolfgang <sup>a, b</sup>, Franz Hallwirth <sup>a</sup>

a) Graz University of Technology, Institute of Analytical Chemistry and Food Chemistry, Graz, Austria

b) Research Center Pharmaceutical Engineering GmbH, Graz, Austria

\* Corresponding author: [helmar.wiltsche@tugraz.at](mailto:helmar.wiltsche@tugraz.at)

Table S1. Fe (I) lines used for the determination of  $T_{\text{exc}}$  by Boltzmann plot method; Fundamental constants where taken from literature [25, 26]

| Wavelength, nm | Excitation Energy, eV | Transition probability for spontaneous emission, $\text{s}^{-1}$ | Statistical weight |
|----------------|-----------------------|------------------------------------------------------------------|--------------------|
| 368.411        | 6.09                  | $3.40 \cdot 10^7$                                                | 7                  |
| 370.109        | 6.35                  | $4.90 \cdot 10^7$                                                | 9                  |
| 370.446        | 6.04                  | $1.40 \cdot 10^7$                                                | 9                  |
| 370.557        | 3.40                  | $3.22 \cdot 10^6$                                                | 7                  |
| 370.925        | 4.26                  | $1.56 \cdot 10^7$                                                | 7                  |
| 371.993        | 3.33                  | $1.63 \cdot 10^7$                                                | 11                 |
| 372.256        | 3.42                  | $4.97 \cdot 10^6$                                                | 5                  |
| 372.438        | 5.61                  | $1.30 \cdot 10^7$                                                | 7                  |
| 372.762        | 4.28                  | $2.25 \cdot 10^7$                                                | 5                  |
| 373.240        | 5.52                  | $2.00 \cdot 10^7$                                                | 5                  |
| 373.332        | 3.43                  | $6.50 \cdot 10^6$                                                | 3                  |
| 373.486        | 4.18                  | $9.02 \cdot 10^7$                                                | 11                 |
| 373.713        | 3.37                  | $1.42 \cdot 10^7$                                                | 9                  |
| 373.831        | 6.58                  | $3.80 \cdot 10^7$                                                | 13                 |
| 374.826        | 3.42                  | $9.15 \cdot 10^6$                                                | 5                  |
| 374.949        | 4.22                  | $7.64 \cdot 10^7$                                                | 9                  |
| 375.361        | 5.48                  | $1.10 \cdot 10^7$                                                | 5                  |
| 375.823        | 4.26                  | $6.34 \cdot 10^7$                                                | 7                  |
| 376.005        | 5.70                  | $5.70 \cdot 10^6$                                                | 15                 |
| 376.053        | 5.52                  | $5.70 \cdot 10^6$                                                | 5                  |
| 376.379        | 4.28                  | $5.44 \cdot 10^7$                                                | 5                  |
| 376.554        | 6.53                  | $9.90 \cdot 10^7$                                                | 15                 |

Table S2. Effect of plasma gas composition on the emission line intensity of several atomic and ionic lines. All emission line data has been normalized to the respective emission intensity in a pure (100 %) nitrogen plasma; RSDs < 2% for all lines and conditions with n=5. The fraction (v/v) of argon in each of the three gas flows is given above each column: OG - outer gas flow; IG -intermediate gas flow; NG - nebulizer gas flow, ND – not determined. Color coding: blue – signal suppression, red – signal enhancement

| Element,<br>emission line | Total<br>line<br>energy, eV | Relative<br>line<br>intensity,<br>% | Emission line intensity normalized to a pure nitrogen plasma |                              |                             |                             |                              |                                |                                 |                                 |                                 |                                 |                                 |
|---------------------------|-----------------------------|-------------------------------------|--------------------------------------------------------------|------------------------------|-----------------------------|-----------------------------|------------------------------|--------------------------------|---------------------------------|---------------------------------|---------------------------------|---------------------------------|---------------------------------|
|                           |                             |                                     | OG: 0%<br>IG: 0%<br>NG: 44%                                  | OG: 0%<br>IG: 0%<br>NG: 100% | OG: 0%<br>IG: 33%<br>NG: 0% | OG: 0%<br>IG: 67%<br>NG: 0% | OG: 0%<br>IG: 100%<br>NG: 0% | OG: 0%<br>IG: 100%<br>NG: 100% | OG: 14%<br>IG: 100%<br>NG: 100% | OG: 29%<br>IG: 100%<br>NG: 100% | OG: 43%<br>IG: 100%<br>NG: 100% | OG: 57%<br>IG: 100%<br>NG: 100% | OG: 71%<br>IG: 100%<br>NG: 100% |
| Al (I) 396.152 nm         | 3.1                         | 100                                 | 0.41                                                         | 0.73                         | 0.99                        | 0.99                        | 0.98                         | 1.12                           | 1.12                            | 1.08                            | 1.01                            | 0.91                            | 0.76                            |
| As (I) 189.042 nm         | 6.6                         | 100                                 | 0.38                                                         | 0.66                         | 1.00                        | 1.00                        | 0.99                         | 1.35                           | 1.29                            | 1.23                            | 1.18                            | 1.07                            | 0.90                            |
| As (I) 193.759 nm         | 6.4                         | 74                                  | 0.37                                                         | 0.65                         | 0.99                        | 0.98                        | 0.96                         | 1.32                           | 1.32                            | 1.28                            | 1.21                            | 1.11                            | 0.94                            |
| B (I) 249.677 nm          | 5.0                         | 50                                  | 0.36                                                         | 0.59                         | 1.01                        | 1.00                        | 1.00                         | 0.99                           | 0.97                            | 0.92                            | 0.87                            | 0.83                            | 0.75                            |
| B (I) 249.773 nm          | 5.0                         | 100                                 | 0.36                                                         | 0.58                         | 1.01                        | 1.00                        | 1.00                         | 1.00                           | 0.97                            | 0.91                            | 0.87                            | 0.83                            | 0.74                            |
| Be (I) 234.861 nm         | 5.3                         | 53                                  | 0.32                                                         | 0.50                         | 1.01                        | 1.00                        | 1.00                         | 0.85                           | 0.80                            | 0.73                            | 0.67                            | 0.59                            | 0.48                            |
| Be (II) 313.042 nm        | 13.3                        | 100                                 | 0.47                                                         | 0.78                         | 1.00                        | 1.00                        | 0.98                         | 1.34                           | 1.29                            | 1.25                            | 1.24                            | 1.22                            | 1.12                            |
| Bi (I) 222.825 nm         | 5.6                         | 32                                  | 0.16                                                         | 0.33                         | 0.99                        | 0.99                        | 1.01                         | 0.92                           | 0.93                            | 0.93                            | 0.88                            | 0.80                            | 0.74                            |
| Bi (I) 223.061 nm         | 5.6                         | 100                                 | 0.17                                                         | 0.36                         | 1.01                        | 1.00                        | 1.00                         | 0.94                           | 0.95                            | 0.91                            | 0.87                            | 0.81                            | 0.71                            |
| Ca (II) 393.366 nm        | 9.3                         | 100                                 | 0.17                                                         | 0.37                         | 1.00                        | 1.00                        | 0.99                         | 1.05                           | 1.12                            | 1.06                            | 1.01                            | 0.93                            | 0.80                            |
| Ca (II) 396.847 nm        | 9.2                         | 49                                  | 0.17                                                         | 0.35                         | 1.01                        | 1.00                        | 0.99                         | 1.04                           | 1.05                            | 1.00                            | 0.95                            | 0.89                            | 0.75                            |
| Cd (II) 214.438 nm        | 14.8                        | 28                                  | 0.21                                                         | 0.42                         | 0.98                        | 0.97                        | 0.97                         | 1.29                           | 1.25                            | 1.22                            | 1.15                            | 1.04                            | 0.85                            |
| Cd (II) 226.502 nm        | 14.5                        | 22                                  | 0.22                                                         | 0.44                         | 0.99                        | 0.97                        | 0.98                         | 1.34                           | 1.34                            | 1.32                            | 1.29                            | 1.24                            | 1.11                            |
| Cd (I) 228.802 nm         | 5.4                         | 100                                 | 0.22                                                         | 0.38                         | 0.99                        | 0.99                        | 0.98                         | 0.92                           | 0.89                            | 0.84                            | 0.77                            | 0.68                            | 0.56                            |
| Co (II) 228.616 nm        | 13.7                        | 87                                  | 0.18                                                         | 0.40                         | 0.98                        | 0.99                        | 0.99                         | 1.12                           | 1.12                            | 1.12                            | 1.10                            | 1.08                            | 0.99                            |
| Co (II) 238.892 nm        | 13.5                        | 76                                  | 0.19                                                         | 0.41                         | 0.98                        | 0.99                        | 0.98                         | 1.14                           | 1.14                            | 1.17                            | 1.17                            | 1.16                            | 1.09                            |
| Co (I) 344.364 nm         | 4.1                         | 100                                 | 0.19                                                         | 0.40                         | 0.98                        | 1.00                        | 0.97                         | 0.88                           | 0.88                            | 0.82                            | 0.84                            | 0.78                            | 0.75                            |
| Cr (II) 205.552 nm        | 12.8                        | 35                                  | 0.16                                                         | 0.34                         | 0.99                        | 0.98                        | 0.96                         | 1.01                           | 1.05                            | 1.02                            | 0.97                            | 0.89                            | 0.75                            |
| Cr (II) 267.716 nm        | 12.9                        | 60                                  | 0.15                                                         | 0.34                         | 1.00                        | 1.00                        | 0.99                         | 1.07                           | 1.09                            | 1.07                            | 1.03                            | 0.97                            | 0.86                            |
| Cr (II) 283.563 nm        | 12.7                        | 100                                 | 0.15                                                         | 0.34                         | 0.99                        | 0.99                        | 0.98                         | 1.04                           | 1.05                            | 1.02                            | 0.99                            | 0.93                            | 0.81                            |
| Cu (I) 324.754 nm         | 3.8                         | 100                                 | 0.23                                                         | 0.44                         | 1.01                        | 1.00                        | 1.00                         | 0.90                           | 0.89                            | 0.86                            | 0.83                            | 0.81                            | 0.75                            |
| Cu (I) 327.396 nm         | 3.8                         | 45                                  | 0.24                                                         | 0.46                         | 1.00                        | 1.00                        | 0.99                         | 0.90                           | 0.93                            | 0.91                            | 0.89                            | 0.86                            | 0.80                            |
| Fe (II) 238.204 nm        | 13.1                        | 70                                  | 0.17                                                         | 0.33                         | 0.98                        | 0.96                        | 0.93                         | 0.99                           | 0.97                            | 0.96                            | 0.94                            | 0.89                            | 0.78                            |
| Fe (II) 239.562 nm        | 13.1                        | 48                                  | 0.16                                                         | 0.34                         | 0.98                        | 0.95                        | 0.92                         | 0.98                           | 0.96                            | 0.97                            | 0.94                            | 0.90                            | 0.79                            |
| Fe (II) 259.941 nm        | 12.7                        | 100                                 | 0.16                                                         | 0.33                         | 0.98                        | 0.96                        | 0.93                         | 0.97                           | 0.94                            | 0.94                            | 0.94                            | 0.92                            | 0.83                            |
| K (I) 766.491 nm          | 1.6                         | 100                                 | 1.08                                                         | 1.16                         | 0.93                        | 0.94                        | 1.03                         | 1.57                           | 1.62                            | 1.80                            | 1.99                            | 2.06                            | 2.02                            |
| Li (I) 670.78 nm          | 1.8                         | 100                                 | 0.66                                                         | 1.03                         | 1.01                        | 1.01                        | 0.97                         | 1.38                           | 1.45                            | 1.37                            | 1.28                            | 1.17                            | 0.99                            |
| Mg (II) 280.270 nm        | 12.1                        | 100                                 | 0.17                                                         | 0.31                         | 1.00                        | 0.99                        | 0.99                         | 0.77                           | 0.76                            | 0.71                            | 0.67                            | 0.60                            | 0.50                            |
| Mg (I) 285.213 nm         | 4.3                         | 64                                  | 0.29                                                         | 0.49                         | 1.01                        | 1.00                        | 1.00                         | 0.81                           | 0.80                            | 0.73                            | 0.65                            | 0.55                            | 0.41                            |
| Mn (II) 257.611 nm        | 12.2                        | 100                                 | 0.15                                                         | 0.31                         | 1.00                        | 0.99                        | 0.98                         | 0.92                           | 0.93                            | 0.88                            | 0.85                            | 0.78                            | 0.68                            |
| Mn (II) 259.373 nm        | 12.2                        | 83                                  | 0.15                                                         | 0.31                         | 1.00                        | 0.99                        | 0.98                         | 0.92                           | 0.92                            | 0.88                            | 0.85                            | 0.79                            | 0.69                            |
| Mn (I) 403.076 nm         | 3.1                         | 28                                  | 0.34                                                         | 0.69                         | 1.00                        | 1.01                        | 1.00                         | 1.10                           | 1.16                            | 1.11                            | 1.05                            | 0.97                            | 0.87                            |

| Element,<br>emission line                                                 | Total<br>line<br>energy, eV | Relative<br>line<br>intensity,<br>% | Emission line intensity normalized to a pure nitrogen plasma |          |         |         |          |          |          |          |          |          |          |          |
|---------------------------------------------------------------------------|-----------------------------|-------------------------------------|--------------------------------------------------------------|----------|---------|---------|----------|----------|----------|----------|----------|----------|----------|----------|
|                                                                           |                             |                                     | OG: 0%                                                       | OG: 0%   | OG: 0%  | OG: 0%  | OG: 0%   | OG: 0%   | OG: 14%  | OG: 29%  | OG: 43%  | OG: 57%  | OG: 71%  |          |
|                                                                           |                             |                                     | IG: 0%                                                       | IG: 0%   | IG: 33% | IG: 67% | IG: 100% |          |
|                                                                           |                             |                                     | NG: 44%                                                      | NG: 100% | NG: 0%  | NG: 0%  | NG: 0%   | NG: 100% |
| Mo (II) 281.615 nm                                                        | 13.2                        | 40                                  | 0.13                                                         | 0.31     | 0.98    | 0.99    | 0.99     | 1.10     | 1.12     | 1.11     | 1.10     | 1.06     | 0.98     |          |
| Mo (II) 281.615 nm                                                        | 3.3                         | 100                                 | 0.25                                                         | 0.54     | 0.99    | 0.99    | 0.99     | 0.96     | 0.98     | 0.96     | 0.91     | 0.84     | 0.76     |          |
| Na (I) 588.995 nm                                                         | 2.1                         | 100                                 | 0.99                                                         | 1.34     | 1.03    | 1.03    | 1.01     | 1.57     | 1.66     | 1.66     | 1.63     | 1.48     | 1.27     |          |
| Na (I) 589.592 nm                                                         | 2.1                         | 52                                  | 0.99                                                         | 1.32     | 1.02    | 1.03    | 1.00     | 1.56     | 1.63     | 1.63     | 1.58     | 1.44     | 1.22     |          |
| Ni (II) 231.604 nm                                                        | 14                          | 10                                  | 0.19                                                         | 0.41     | 0.96    | 0.94    | 0.93     | 1.17     | 1.25     | 1.29     | 1.26     | 1.24     | 1.16     |          |
| Ni (I) 232.003 nm                                                         | 5.3                         | 20                                  | 0.21                                                         | 0.38     | 1.00    | 0.99    | 0.99     | 0.87     | 0.88     | 0.84     | 0.81     | 0.74     | 0.65     |          |
| Ni (I) 352.454 nm                                                         | 3.5                         | 100                                 | 0.09                                                         | 0.45     | 0.95    | 0.94    | 0.98     | 0.82     | 0.93     | 0.93     | 0.83     | 0.91     | 0.87     |          |
| P (I) 177.495 nm                                                          | 7.0                         | 58                                  | 0.60                                                         | 0.98     | 1.01    | 1.01    | 1.00     | 1.58     | ND       | ND       | ND       | ND       | ND       |          |
| P (I) 178.287 nm                                                          | 7.0                         | 40                                  | 0.59                                                         | 0.96     | 1.00    | 1.01    | 1.00     | 1.57     | ND       | ND       | ND       | ND       | ND       |          |
| P (I) 213.618 nm                                                          | 7.2                         | 100                                 | 0.59                                                         | 0.94     | 0.99    | 0.99    | 0.97     | 1.63     | ND       | ND       | ND       | ND       | ND       |          |
| Pb (II) 220.353 nm                                                        | 14.8                        | 14                                  | 0.12                                                         | 0.32     | 0.95    | 0.97    | 0.95     | 1.24     | 1.24     | 1.17     | 1.12     | 1.00     | 0.85     |          |
| Pb (I) 405.778 nm                                                         | 4.4                         | 100                                 | 0.25                                                         | 0.52     | 0.99    | 1.00    | 0.99     | 1.00     | 1.02     | 0.97     | 0.91     | 0.81     | 0.69     |          |
| S (I) 180.731 nm                                                          | 6.9                         | 100                                 | 0.64                                                         | 1.01     | 0.99    | 1.00    | 0.97     | 1.56     | ND       | ND       | ND       | ND       | ND       |          |
| S (I) 182.034 nm                                                          | 6.9                         | 60                                  | 0.66                                                         | 1.02     | 0.99    | 1.00    | 0.99     | 1.59     | ND       | ND       | ND       | ND       | ND       |          |
| Sb (I) 206.833 nm                                                         | 6.0                         | 67                                  | 0.20                                                         | 0.38     | 1.06    | 1.04    | 1.07     | 1.10     | 0.93     | 0.94     | 0.91     | 0.85     | 0.74     |          |
| Sb (I) 217.581 nm                                                         | 5.7                         | 82                                  | 0.16                                                         | 0.34     | 1.00    | 1.00    | 0.99     | 0.99     | 0.96     | 0.95     | 0.94     | 0.85     | 0.79     |          |
| Sb (I) 231.147 nm                                                         | 5.4                         | 100                                 | 0.17                                                         | 0.35     | 1.00    | 0.98    | 0.94     | 0.98     | 1.02     | 0.99     | 0.95     | 0.90     | 0.82     |          |
| Sc (II) 361.384 nm                                                        | 10                          | 100                                 | 0.14                                                         | 0.29     | 1.01    | 1.01    | 1.00     | 0.88     | 0.88     | 0.85     | 0.81     | 0.74     | 0.64     |          |
| Sc (II) 424.683 nm                                                        | 9.8                         | 38                                  | 0.14                                                         | 0.30     | 1.01    | 1.00    | 1.01     | 0.87     | 0.88     | 0.85     | 0.82     | 0.77     | 0.67     |          |
| Se (I) 196.09 nm                                                          | 6.3                         | 100                                 | 0.43                                                         | 0.74     | 0.99    | 0.98    | 0.98     | 1.41     | 1.35     | 1.30     | 1.20     | 1.09     | 0.91     |          |
| Se (I) 203.985 nm                                                         | 6.3                         | 72                                  | 0.44                                                         | 0.75     | 0.97    | 0.98    | 0.99     | 1.42     | 1.42     | 1.32     | 1.22     | 1.10     | 0.92     |          |
| Sr (II) 407.771 nm                                                        | 10.4                        | 100                                 | 0.17                                                         | 0.35     | 1.00    | 1.00    | 0.99     | 1.10     | 1.16     | 1.12     | 1.05     | 0.94     | 0.80     |          |
| Sr (II) 421.552 nm                                                        | 10.3                        | 51                                  | 0.16                                                         | 0.34     | 1.01    | 1.02    | 1.01     | 1.10     | 1.16     | 1.13     | 1.08     | 0.97     | 0.83     |          |
| Ti (II) 307.864 nm                                                        | 10.9                        | 22                                  | 0.13                                                         | 0.27     | 0.99    | 0.99    | 0.98     | 0.87     | 0.88     | 0.85     | 0.81     | 0.75     | 0.65     |          |
| Ti (II) 334.941 nm                                                        | 10.6                        | 100                                 | 0.13                                                         | 0.30     | 1.00    | 1.00    | 1.00     | 0.90     | 0.93     | 0.90     | 0.88     | 0.83     | 0.75     |          |
| Ti (II) 336.121 nm                                                        | 10.5                        | 93                                  | 0.14                                                         | 0.31     | 1.00    | 0.99    | 1.00     | 0.90     | 0.94     | 0.92     | 0.89     | 0.85     | 0.76     |          |
| Tl (I) 276.787 nm                                                         | 4.5                         | 100                                 | 0.37                                                         | 0.71     | 1.01    | 1.01    | 1.01     | 1.22     | 1.23     | 1.17     | 1.10     | 0.97     | 0.79     |          |
| V (II) 292.464 nm                                                         | 11.4                        | 25                                  | 0.14                                                         | 0.31     | 0.99    | 0.99    | 0.98     | 0.94     | 0.96     | 0.95     | 0.91     | 0.87     | 0.76     |          |
| V (II) 309.311 nm                                                         | 11.1                        | 100                                 | 0.13                                                         | 0.30     | 1.00    | 0.99    | 1.00     | 0.94     | 0.95     | 0.92     | 0.89     | 0.86     | 0.76     |          |
| V (II) 311.071 nm                                                         | 11.1                        | 62                                  | 0.14                                                         | 0.31     | 1.00    | 1.00    | 0.99     | 0.94     | 0.94     | 0.92     | 0.89     | 0.87     | 0.79     |          |
| Zn (II) 202.548 nm                                                        | 15.5                        | 22                                  | 0.38                                                         | 0.67     | 0.99    | 0.99    | 0.98     | 1.57     | 1.53     | 1.47     | 1.41     | 1.30     | 1.08     |          |
| Zn (II) 206.191 nm                                                        | 15.4                        | 14                                  | 0.38                                                         | 0.68     | 0.99    | 0.99    | 0.98     | 1.58     | 1.53     | 1.48     | 1.45     | 1.34     | 1.11     |          |
| Zn (I) 213.856 nm                                                         | 5.8                         | 100                                 | 0.25                                                         | 0.39     | 0.99    | 0.99    | 0.97     | 0.85     | 0.80     | 0.74     | 0.66     | 0.57     | 0.44     |          |
| Area of the analyte channel<br>normalized to a pure nitrogen<br>plasma, % |                             |                                     | 99 ± 4                                                       | 101 ± 3  | 105 ± 3 | 109 ± 3 | 115 ± 4  | 107 ± 3  | 104 ± 5  | 111 ± 4  | 124 ± 3  | 141 ± 3  | 161 ± 3  |          |
| Mg ratio (Mg (II) 280.27 nm / Mg (I)<br>285.213 nm)                       |                             |                                     | 0.9                                                          | 1.0      | 1.6     | 1.6     | 1.6      | 1.5      | 1.5      | 1.6      | 1.6      | 1.7      | 1.8      |          |

Table S3. Limits of detection (LOD; calculated by blank method) and limits of quantification (LOQ; calculated by calibration method) of selected emission lines determined with pure nitrogen or combined argon / nitrogen supply (pure argon in nebulizer- and intermediate gas flow; pure nitrogen in the outer gas flow) as plasma gas

| Element,<br>Emission line | Total line energy,<br>eV | N <sub>2</sub> MICAP    |                         | Ar / N <sub>2</sub> MICAP |                         |
|---------------------------|--------------------------|-------------------------|-------------------------|---------------------------|-------------------------|
|                           |                          | LOD, µg L <sup>-1</sup> | LOQ, µg L <sup>-1</sup> | LOD, µg L <sup>-1</sup>   | LOQ, µg L <sup>-1</sup> |
| Ag (I) 328.068 nm         | 3.8                      | 4                       | 8                       | 10                        | 20                      |
| Ag (I) 338.289 nm         | 3.7                      | 8                       | 10                      | 5                         | 20                      |
| Al (I) 396.152 nm         | 3.1                      | 1                       | 9                       | 6                         | 12                      |
| As (I) 189.042 nm         | 6.6                      | 300                     | 400                     | 200                       | 300                     |
| As (I) 193.759 nm         | 6.4                      | 200                     | 300                     | 200                       | 300                     |
| B (I) 249.677 nm          | 5                        | 10                      | 30                      | 10                        | 20                      |
| B (I) 249.773 nm          | 5                        | 8                       | 10                      | 4                         | 10                      |
| Ba (II) 233.527 nm        | 11.2                     | 10                      | 20                      | 10                        | 20                      |
| Ba (II) 455.404 nm        | 7.9                      | 0.1                     | 2                       | 0.1                       | 3                       |
| Be (I) 234.861 nm         | 5.3                      | 1                       | 2                       | 1                         | 4                       |
| Be (II) 313.042 nm        | 13.3                     | 2                       | 2                       | 2                         | 3                       |
| Bi (I) 222.825 nm         | 5.6                      | 400                     | 500                     | 300                       | 500                     |
| Bi (I) 223.061 nm         | 5.6                      | 100                     | 200                     | 100                       | 200                     |
| Ca (II) 317.933 nm        | 13.2                     | 20                      | 20                      | 20                        | 30                      |
| Ca (II) 393.366 nm        | 9.3                      | 0.2                     | 2                       | 0.2                       | 3                       |
| Ca (II) 396.847 nm        | 9.2                      | 0.2                     | 2                       | 0.2                       | 3                       |
| Cd (II) 214.438 nm        | 14.8                     | 40                      | 60                      | 30                        | 40                      |
| Cd (II) 226.502 nm        | 14.5                     | 30                      | 50                      | 30                        | 50                      |
| Cd (I) 228.802 nm         | 5.4                      | 10                      | 20                      | 3                         | 20                      |
| Co (II) 238.892 nm        | 13.5                     | 20                      | 30                      | 30                        | 40                      |
| Cr (II) 205.552 nm        | 12.8                     | 80                      | 90                      | 30                        | 50                      |
| Cr (II) 267.716 nm        | 12.9                     | 30                      | 40                      | 20                        | 30                      |
| Cr (II) 283.563 nm        | 12.7                     | 20                      | 30                      | 10                        | 20                      |
| Cu (I) 324.754 nm         | 3.8                      | 4                       | 5                       | 6                         | 9                       |
| Cu (I) 327.396 nm         | 3.8                      | 7                       | 10                      | 8                         | 20                      |
| Fe (II) 238.204 nm        | 13.1                     | 20                      | 30                      | 20                        | 30                      |
| Fe (II) 239.562 nm        | 13.1                     | 10                      | 20                      | 20                        | 30                      |
| Fe (II) 259.941 nm        | 12.7                     | 4                       | 10                      | 6                         | 8                       |
| K (I) 766.491 nm          | 1.6                      | 1                       | 8                       | 9                         | 30                      |
| Li (I) 670.780 nm         | 1.8                      | 0.1                     | 3                       | 0.2                       | 3                       |
| Mg (II) 280.27 nm         | 12.1                     | 0.3                     | 3                       | 1                         | 4                       |
| Mg (I) 285.213 nm         | 4.3                      | 0.6                     | 3                       | 1                         | 3                       |
| Mn (II) 257.611 nm        | 12.2                     | 3                       | 5                       | 3                         | 5                       |
| Mn (II) 259.373 nm        | 12.2                     | 1                       | 3                       | 2                         | 5                       |
| Mn (I) 403.076 nm         | 3.1                      | 2                       | 9                       | 5                         | 11                      |
| Mo (II) 281.615 nm        | 13.2                     | 30                      | 40                      | 20                        | 30                      |
| Na (I) 588.995 nm         | 2.1                      | 5                       | 8                       | 0.4                       | 2                       |
| Na (I) 589.592 nm         | 2.1                      | 5                       | 7                       | 1                         | 3                       |
| Ni (II) 231.604 nm        | 14                       | 100                     | 200                     | 50                        | 70                      |
| Ni (I) 232.003 nm         | 5.3                      | 60                      | 70                      | 30                        | 50                      |
| Ni (I) 352.454 nm         | 3.5                      | 60                      | 100                     | 40                        | 100                     |
| P (I) 177.495 nm          | 7                        | 200                     | 1000                    | 100                       | 500                     |
| P (I) 178.287 nm          | 7                        | 300                     | 900                     | 400                       | 600                     |
| P (I) 213.618 nm          | 7.2                      | 400                     | 600                     | 200                       | 500                     |

| Element,<br>Emission line | Total line energy,<br>eV | N <sub>2</sub> MICAP      |                           | Ar / N <sub>2</sub> MICAP |                           |
|---------------------------|--------------------------|---------------------------|---------------------------|---------------------------|---------------------------|
|                           |                          | LOD, $\mu\text{g L}^{-1}$ | LOQ, $\mu\text{g L}^{-1}$ | LOD, $\mu\text{g L}^{-1}$ | LOQ, $\mu\text{g L}^{-1}$ |
| Pb (I) 405.778 nm         | 4.4                      | 20                        | 40                        | 30                        | 70                        |
| S (I) 180.731 nm          | 6.9                      | 1000                      | 2000                      | 1000                      | 2000                      |
| S (I) 182.034 nm          | 6.9                      | 1000                      | 4000                      | 2000                      | 4000                      |
| Sb (I) 206.833 nm         | 6                        | 300                       | 600                       | 100                       | 200                       |
| Sb (I) 217.581 nm         | 5.7                      | 200                       | 300                       | 90                        | 100                       |
| Se (I) 196.09 nm          | 6.3                      | 500                       | 600                       | 300                       | 400                       |
| Sr (II) 407.771 nm        | 10.4                     | 0.05                      | 2                         | 0.1                       | 2                         |
| Sr (II) 421.552 nm        | 10.3                     | 0.07                      | 3                         | 0.1                       | 3                         |
| Ti (II) 307.864 nm        | 10.9                     | 6                         | 10                        | 8                         | 20                        |
| Ti (II) 334.941 nm        | 10.6                     | 4                         | 7                         | 5                         | 12                        |
| Ti (II) 336.121 nm        | 10.5                     | 20                        | 30                        | 30                        | 50                        |
| Tl (I) 276.787 nm         | 4.5                      | 50                        | 60                        | 20                        | 50                        |
| V (II) 292.464 nm         | 11.4                     | 20                        | 30                        | 20                        | 30                        |
| V (II) 309.311 nm         | 11.1                     | 7                         | 10                        | 3                         | 10                        |
| V (II) 311.071 nm         | 11.1                     | 20                        | 20                        | 30                        | 40                        |
| Zn (II) 202.548 nm        | 15.5                     | 70                        | 60                        | 20                        | 50                        |
| Zn (II) 206.191 nm        | 15.4                     | 200                       | 300                       | 100                       | 200                       |
| Zn (I) 213.856 nm         | 5.8                      | 20                        | 30                        | 20                        | 30                        |

Table S4. Effect of argon concentration in the outer gas flow on a MICAP (1000 W microwave power; 0.9 L min<sup>-1</sup> N<sub>2</sub> nebulizer gas flow, 0.6 L min<sup>-1</sup> N<sub>2</sub> intermediate gas flow; 14 L min<sup>-1</sup> outer gas flow); position, setup and magnification of the camera remained unchanged for all images.

| Averaged camera image<br>(3000 images averaged)                                     | Segmented camera image<br>(4 levels of luminance)                                   | Gas composition of the outer gas flow |
|-------------------------------------------------------------------------------------|-------------------------------------------------------------------------------------|---------------------------------------|
| 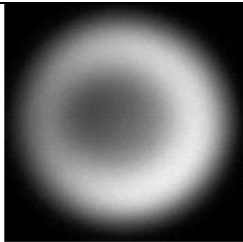   |    | 100 % N <sub>2</sub>                  |
|    |    | 86 % N <sub>2</sub> + 14 % Ar (v/v)   |
|   |   | 71 % N <sub>2</sub> + 29 % Ar (v/v)   |
|  |  | 57 % N <sub>2</sub> + 43 % Ar (v/v)   |
|  |  | 43 % N <sub>2</sub> + 57 % Ar (v/v)   |
|  |  | 29 % N <sub>2</sub> + 71 % Ar (v/v)   |
